# Supplementary material
Source: HighWire-hosted journal article supplement (https://bmjopen.bmj.com/content/7/4/e014304)

Supplementary File 4. Funnel Plot

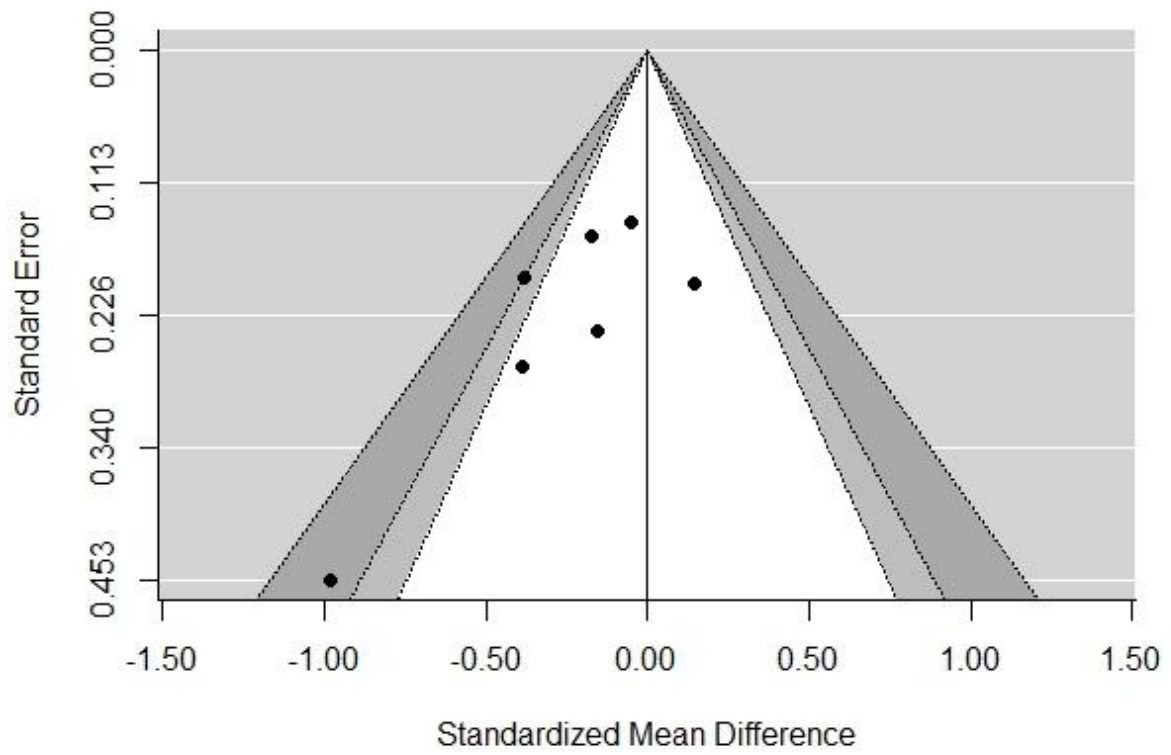

Supplement: inline-supplementary-material-4 [file inline-supplementary-material-4.pdf]
